# Supplementary material
Source: PubMed Central journal article supplement (PMC7959998)
Supplement: 16-00703.pdf [file 16-00703.pdf]

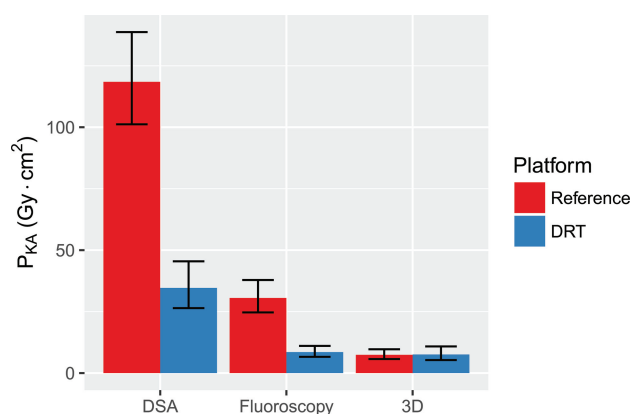

**ON-LINE FIG 1.** Analysis of the contribution from fluoroscopy, DSA, and 3D imaging (including rotational angiography and conebeam CT acquisitions) to the CP<sub>KA</sub>. During the study period, data distribution for fluoroscopy, DSA, and 3D imaging was available for a subset of cases ( $n = 94$ ) on the dose-monitoring software (DoseWise Portal; Philips Healthcare). Most available cases were performed on the dose-reduction platform ( $n = 56$ ), of which 21 were diagnostic. Among the cases available on the reference platform ( $n = 38$ ), almost all were diagnostic ( $n = 33$ ). Examination CP<sub>KA</sub> values were appropriately Box-Cox transformed before statistical analysis. Back-transformed means and 95% confidence intervals are reported.

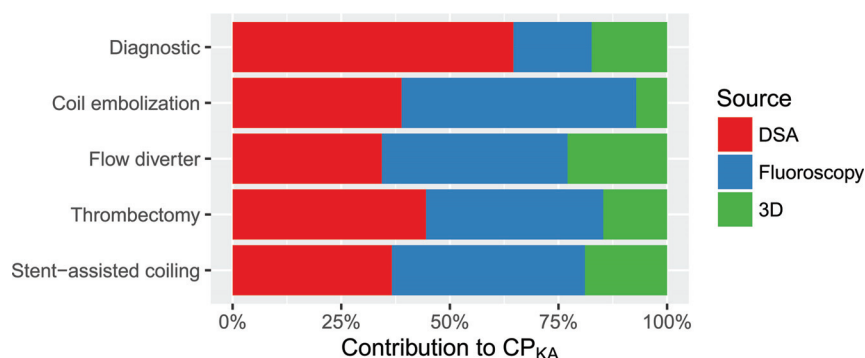

**ON-LINE FIG 2.** Relative contribution of fluoroscopy, angiography and 3D imaging. On the dose-reduction platform, contributions to examination CP<sub>KA</sub> from different imaging modes (DSA, fluoroscopy, 3D imaging) vary with procedure type. We included procedures with at least 4 cases available for analysis: thrombectomy ( $n = 4$ ), stent-assisted coiling ( $n = 4$ ), flow diverter ( $n = 12$ ), diagnostic ( $n = 21$ ), and coil embolization ( $n = 12$ ).

**On-line Table: Image mode contribution to diagnostic CP<sub>KA</sub><sup>a</sup>**

|             | Reference ( $n = 33$ ) | Dose Reduction ( $n = 21$ ) | Two-Sample $t$ Test    |
|-------------|------------------------|-----------------------------|------------------------|
| Fluoroscopy | 30.6 (24.7–37.9)       | 8.6 (6.6–11.1)              | $t = -7.87, P < .0001$ |
| DSA         | 118.5 (101.2–138.7)    | 34.7 (26.4–45.5)            | $t = -8.12, P < .0001$ |
| 3D imaging  | 7.4 (5.7–9.7)          | 7.6 (5.3–10.8)              | $t = 0.09, P = .9303$  |
| Total exam  | 161.1 (138.3–187.6)    | 54.9 (44.7–67.3)            | $t = -8.73, P = .0001$ |

<sup>a</sup> The contribution of different imaging modes (fluoroscopy, angiography, and 3D imaging) to the examination CP<sub>KA</sub> for diagnostic cases, reported as mean (95% confidence interval). The dose-reduction platform was associated with significantly lower fluoroscopic and angiographic P<sub>KA</sub> values, while the P<sub>KA</sub> from 3D imaging was not affected.
